# Supplementary material for: Echocardiographic Profiling Predicts Clinical Outcomes After Mitral Transcatheter Edge‐to‐Edge Repair
Source: PubMed Central journal article supplement — J Am Heart Assoc. 2024 Feb 23;13(5):e032784. doi: 10.1161/JAHA.123.032784 (PMC10944065; doi:10.1161/jaha.123.032784), 2024-02-23
Supplement: JAH3-13-e032784-s001.pdf [file JAH3-13-e032784-s001.pdf]

# **SUPPLEMENTAL MATERIAL**

**Table S1. Predictors associated with the poor profile.**

| <b>Forest Plot of Predictors of Poor Profile</b> |           |                     |                     |                  |                      |           |                     |                     |                  |
|--------------------------------------------------|-----------|---------------------|---------------------|------------------|----------------------|-----------|---------------------|---------------------|------------------|
| <b>Univariable</b>                               | <b>HR</b> | <b>CI<br/>Lower</b> | <b>CI<br/>Upper</b> | <b>p-value</b>   | <b>Multivariable</b> | <b>HR</b> | <b>CI<br/>Lower</b> | <b>CI<br/>Upper</b> | <b>p-value</b>   |
| Age                                              | 0.98      | 0.98                | 0.99                | <b>0.012</b>     |                      | 0.99      | 0.98                | 1.00                | 0.07             |
| MR<br>Etiology                                   | 1.15      | 0.99                | 1.33                | 0.05             |                      |           |                     |                     |                  |
| Atrial<br>Fibrillation                           | 1.12      | 0.92                | 1.36                | 0.238            |                      |           |                     |                     |                  |
| Prior Stroke                                     | 1.22      | 0.91                | 1.63                | 0.167            |                      |           |                     |                     |                  |
| Post LAP                                         | 1.03      | 1.02                | 1.05                | <b>&lt;0.001</b> |                      | 1.03      | 1.01                | 1.04                | <b>&lt;0.001</b> |
| Baseline<br>creatinine                           | 1.05      | 0.99                | 1.12                | 0.07             |                      |           |                     |                     |                  |
| PASP                                             | 1.01      | 0.99                | 1.01                | 0.07             |                      |           |                     |                     |                  |
| Baseline<br>hemoglobin                           | 0.91      | 0.87                | 0.94                | <b>&lt;0.001</b> |                      | 0.93      | 0.89                | 0.97                | <b>0.001</b>     |
| BMI                                              | 1.01      | 1                   | 1.03                | <b>0.04</b>      |                      | 1.01      | 0.98                | 1.02                | 0.55             |
| LVEF                                             | 0.99      | 0.98                | 1.01                | 0.187            |                      |           |                     |                     |                  |

BMI= body mass index; LAP= left atrial pressure; LVEF= left ventricular ejection fraction;  
 MAC= mitral annular calcification, MR=mitral regurgitation; PASP= pulmonary artery systolic  
 pressure; TR=tricuspid regurgitation  
**p-value significant if <0.05**

**Figure S1. Tricuspid Regurgitation Severity Before and After MitraClip.**

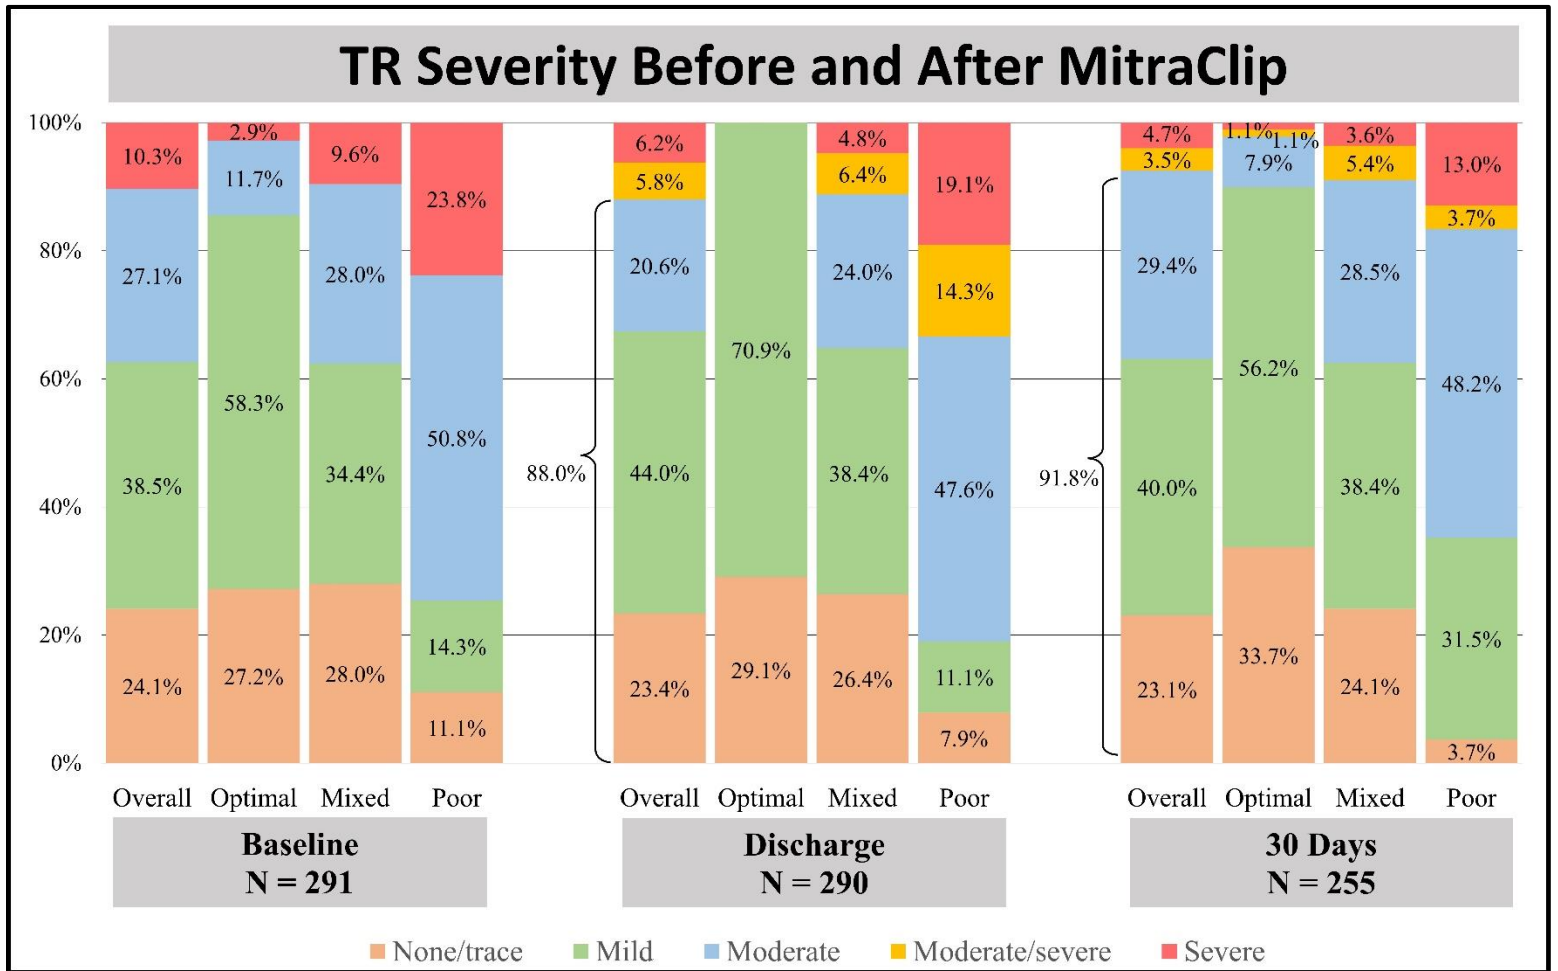

TR severity at baseline, pre-discharge, and 30 days.

TR= tricuspid regurgitation
